# Supplementary figures and images for: Green synthesis and corrosion inhibition study of 2-amino-N′-((thiophen-2-yl)methylene)benzohydrazide
Source: Royal Society of Chemistry journal article supplement (doi:10.1039/c7nj04162d), 2018-01-01

Manuscript ID NJ-ART-10-2017-004162

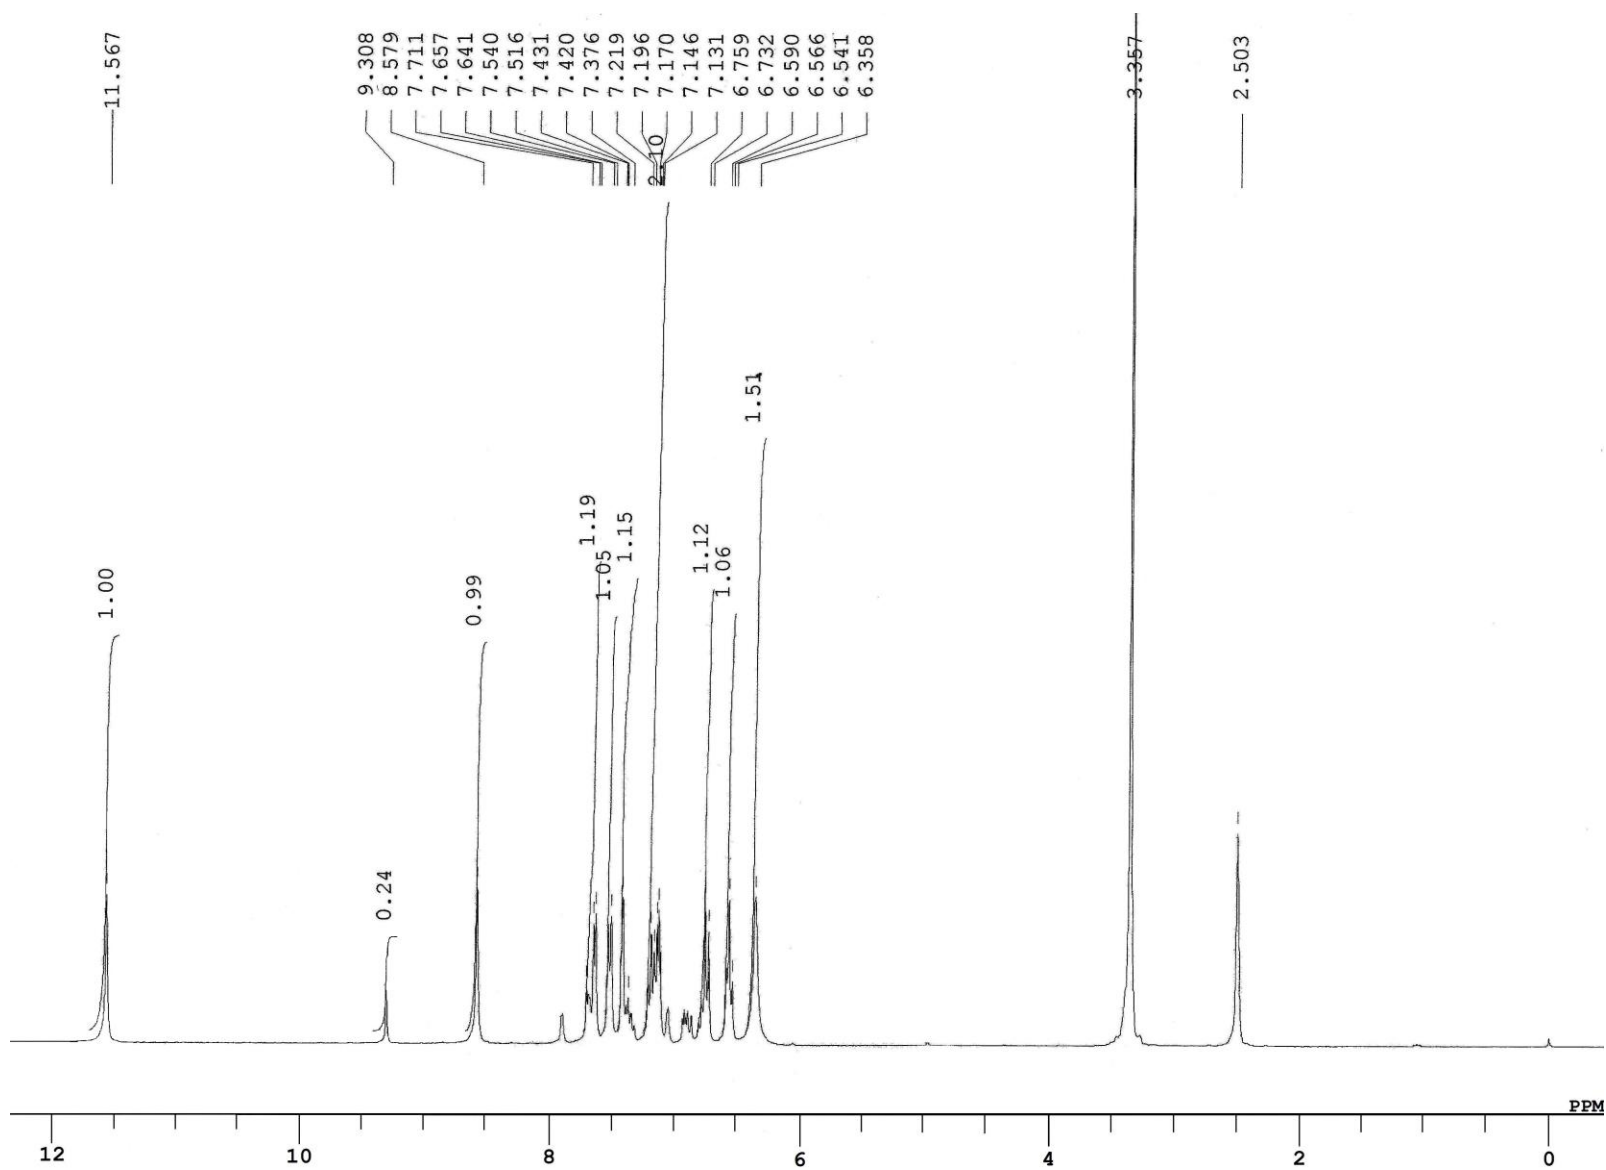

<sup>1</sup>H NMR spectrum of ATMBH

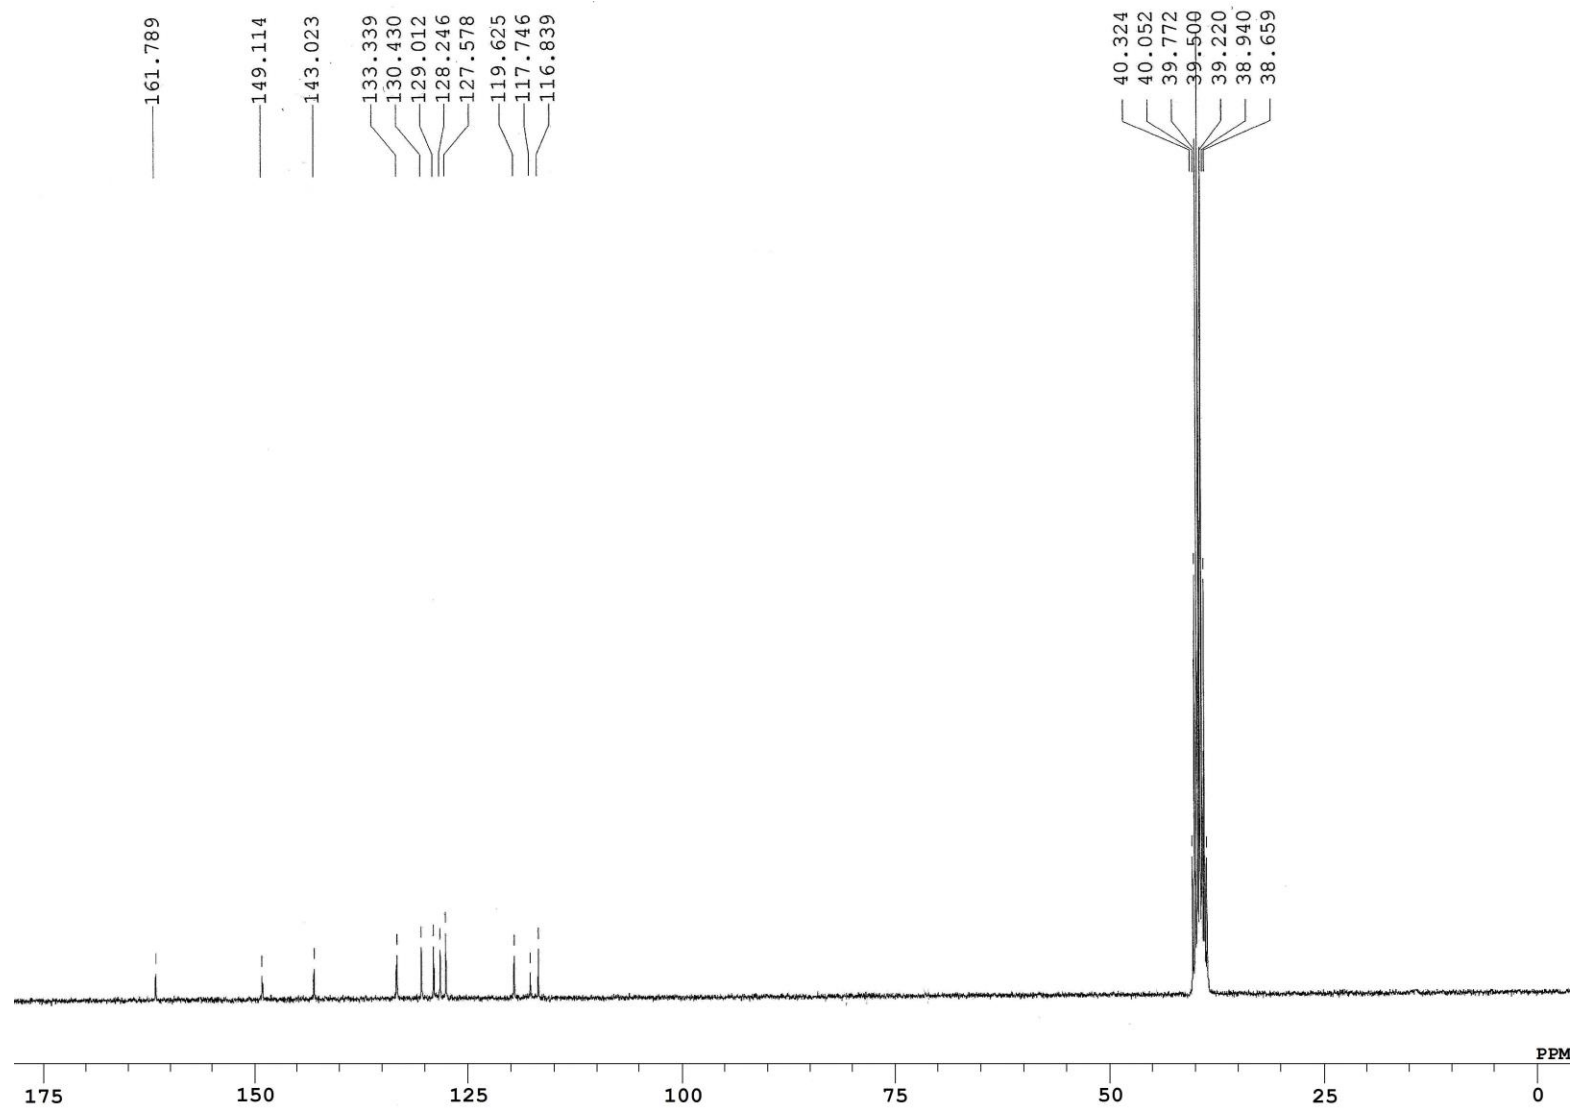

$^{13}\text{C}$  NMR spectrum of ATMBH

Supplement: c7nj04162d1.pdf [file c7nj04162d1.pdf]
